# Supplementary material for: Giant dielectric response and relaxation behavior in (Tm + Ta) co-doped TiO2 ceramics
Source: Royal Society of Chemistry journal article supplement (doi:10.1039/d1cp05348e), 2022-01-01
Supplement: d1cp05348e1.pdf [file d1cp05348e1.pdf]

## Giant dielectric response and relaxation behavior in (Tm + Ta) co-doped TiO<sub>2</sub> ceramics

Jiangtao Fan<sup>1</sup>, Yimeng Cheng<sup>1</sup>, Zhen Long<sup>1</sup>, Liping Tong<sup>1</sup>, Gang He<sup>1\*</sup>, Zhanggui Hu<sup>1\*</sup>

1. Tianjin Key Laboratory of Functional Crystal Materials, Institute of Functional Crystal, College of Material Science and Engineering, Tianjin University of Technology, Tianjin 300384, China

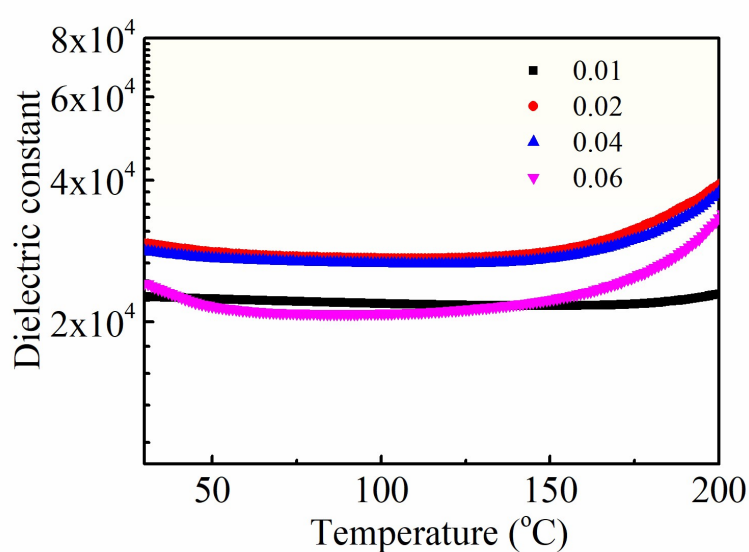

**Fig. S1.** Compositional dependence of dielectric constant at 1 kHz.

For practical applications in electronic devices, the temperature coefficient of  $\epsilon'$  ( $(\Delta\epsilon'(T))/\epsilon'_{25}$ , calculated at 1 kHz) should be less than  $\pm 15\%$  relative to room temperature for X-R type capacitors. At 1 kHz, the temperature coefficients of  $(\text{Tm}_{0.5}\text{Ta}_{0.5})_{0.01}\text{Ti}_{0.99}\text{O}_2$  ceramics ( $x=0.01 - 0.06$ ) are 1.2%, 18%, 27% and 37% in the range of 30 ~ 200°C, respectively. It can be seen that the composition with  $x = 0.1$  has excellent temperature stability.

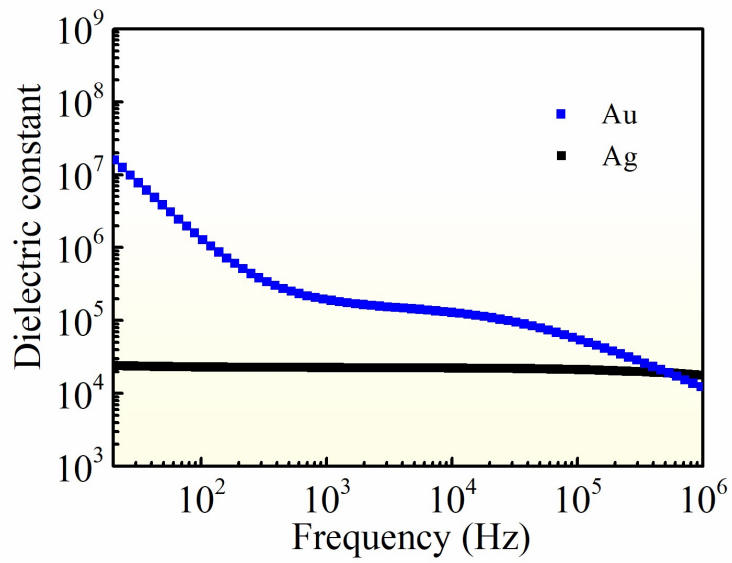

**Fig. S2.** Dielectric constant of  $(\text{Tm}_{0.5}\text{Ta}_{0.5})_{0.01}\text{Ti}_{0.99}\text{O}_2$  with Ag and Au electrodes.

Fig. S2 shows dielectric performance of Tm + Ta co-doped rutile  $\text{TiO}_2$  ( $x = 0.01$ ) with different electrodes (Au and Ag). As seen, the sample with Au electrode shows much higher permittivity than that with Ag electrode, indicating electrode effect greatly contributes to CP behavior at least in the low frequency range.
